# Supplementary material for: PLA2G7/PAF-AH as Potential Negative Regulator of the Wnt Signaling Pathway Mediates Protective Effects in BRCA1 Mutant Breast Cancer
Source: MDPI journal article supplement (doi:10.3390/ijms24010882), 2023-01-03
Supplement: s1 [file s1]

Additional file to

## **PLA2G7/PAF-AH as potential negative regulator of the Wnt signaling pathway mediates protective effects in BRCA1 mutant breast cancer**

**Table S1: Cell culture components for MCF10A.**

| <b>Component</b>                                  | <b>Growth Medium</b>     | <b>Assay Medium<br/>(Without EGF)</b> |
|---------------------------------------------------|--------------------------|---------------------------------------|
| DMEM/F12 (Invitrogen #11330-032)                  | 500.0 ml                 | 500.0 ml                              |
| Horse Serum (Invitrogen#16050-122)                | 25.0 ml (5% final)       | 10.00 ml (2% final)                   |
| EGF (100 µg/ml stock) (Peprotech, 1 mg)           | 100 µl (20ng/ml final)   | --                                    |
| Hydrocortisone (1mg/ml) (Sigma #H-0888)           | 250 µl (0.5 mg/ml final) | 250 µl (0.5 µg/ml final)              |
| Cholera Toxin (1mg/ml stock) (Sigma #C-8052)      | 50 µl (100 ng/ml final)  | 50µl (100 ng/ml final)                |
| Insulin (10mg/ml stock) (Sigma #I-1882)           | 500 µl (10µg/ml final)   | 500 µl (10µg/ml final)                |
| Pen/Strep (100 x solution, Invitrogen #15070-063) | 5.0 ml                   | 5.0 ml                                |

**Table S2: Sequences of primers used in qPCR to determine mRNA expression levels.**

|               |                                                                    |
|---------------|--------------------------------------------------------------------|
| <i>PLA2G7</i> | Forward: GGCTCTACCTTAGAACCCCTGAAA<br>Reverse: TTTTGCTCTTTGCCGTACCT |
| <i>ACTB</i>   | Forward: TCCTCCCTGGAGAAGAGCTA<br>Reverse: CGTGGATGCCACAGGACT       |
| <i>GAPDH</i>  | Forward: AGCCACATCGCTCAGACAC<br>Reverse: GCCCAATACGACCAAATCC       |

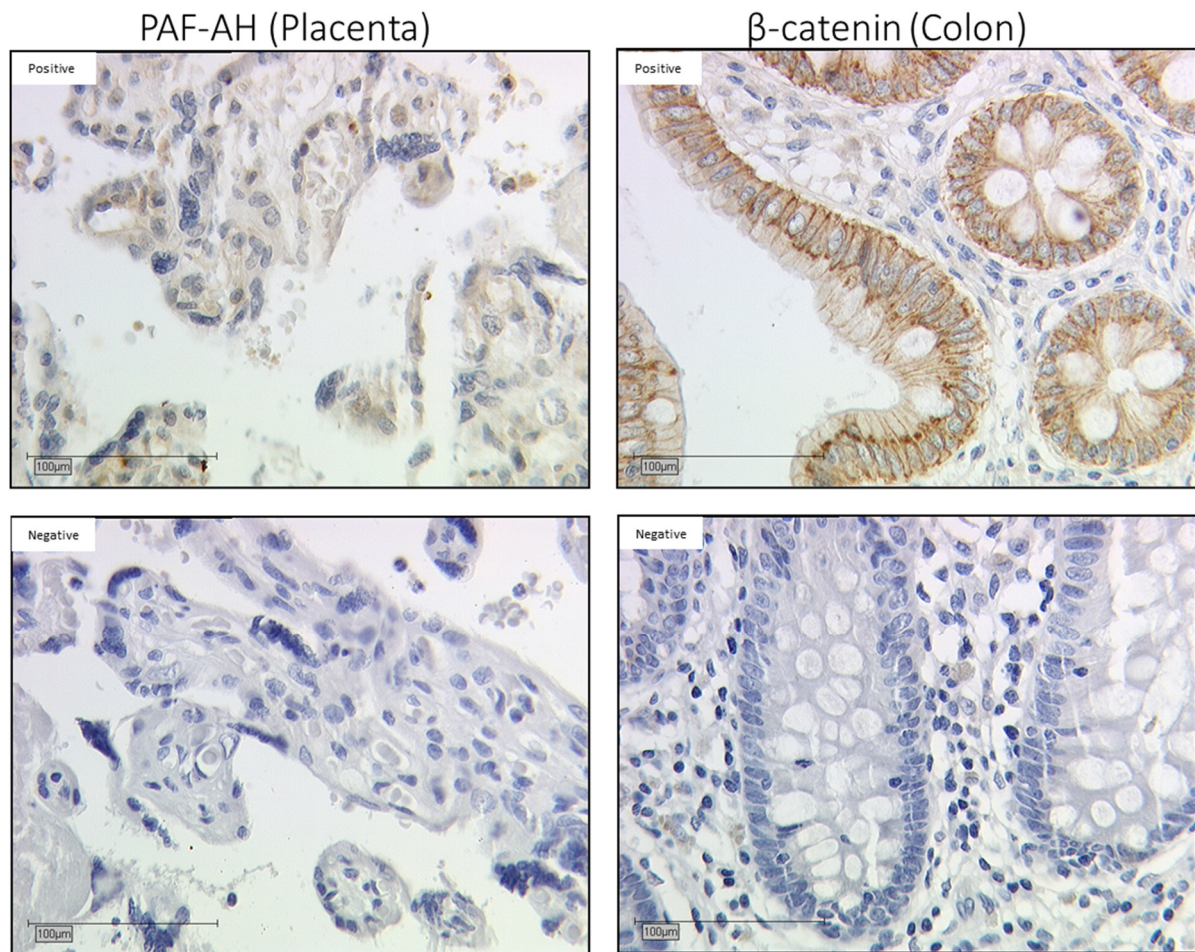

**Figure S1: Positive and negative system controls for PAF-AH and  $\beta$ -catenin staining.** Placenta and colon tissue served as positive and negative system controls for immunostainings (scale bar = 100 $\mu$ m).
